# Supplementary material
Source: HighWire-hosted journal article supplement (https://thorax.bmj.com/content/75/11/982)
Supplement: inline-supplementary-material-1 [file inline-supplementary-material-1.pdf]

## Supplementary information

### Effects of Wnt Signaling on Epithelial-Mesenchymal Transition in Chronic Rhinosinusitis with Nasal Polyp

Jun-Sang Bae<sup>1,2,3\*</sup>, Gwanghui Ryu<sup>4\*</sup>, Ji Hye Kim<sup>1,2</sup>, Eun Hee Kim<sup>1,2</sup>, Yun Hee Rhee<sup>1,2,3</sup>, Young-Jun Chung<sup>1,2,3</sup>, Dae Woo Kim<sup>5</sup>, Suha Lim<sup>6,7</sup>, Phil-Sang Chung<sup>1,2,3</sup>, Hyun-Woo Shin<sup>6,7,8,9†</sup>, and Ji-Hun Mo<sup>1,2,3†</sup>

<sup>1</sup>Department of Otorhinolaryngology, Dankook University College of Medicine, Cheonan, Republic of Korea

<sup>2</sup>Beckman Laser Institute Korea, Dankook University College of Medicine, Cheonan, Republic of Korea

<sup>3</sup>Laser Translational Clinical Trial Center, Dankook University Hospital, Cheonan, Republic of Korea

<sup>4</sup>Department of Otorhinolaryngology-Head and Neck Surgery, Soonchunhyang University College of Medicine, Cheonan, Republic of Korea

<sup>5</sup>Department of Otorhinolaryngology-Head and Neck Surgery, Boramae Medical Center, Seoul National University College of Medicine, Seoul, Republic of Korea

<sup>6</sup>Obstructive Upper airway Research (OUaR) Laboratory, Department of Pharmacology, Seoul National University College of Medicine, Seoul, Republic of Korea

<sup>7</sup>Department of Biomedical Sciences, Seoul National University Graduate School, Seoul,

23 Republic of Korea;

24 <sup>8</sup>Cancer Research Institute, Seoul National University College of Medicine, Seoul, Republic of  
25 Korea

26 <sup>9</sup>Department of Otorhinolaryngology-Head and Neck Surgery, Seoul National University  
27 Hospital, Seoul, Republic of Korea

28

## 29    **Supplementary Methods**

### 30    ***Murine model of chronic rhinosinusitis with polypoid lesions and tissue preparations***

31    Apc<sup>Min/+</sup> mice on the C57BL/6J genetic background were purchased from the Jackson  
32    Laboratory (Bar Harbor, ME). Twenty female BALB/c mice (4 weeks of age, 13.5-15.5 g) were  
33    purchased from Orient Bio Inc. (Seongnam, Gyeonggi, Republic of Korea). The mice were  
34    maintained under specific pathogen-free conditions with a 12/12-hour light/dark cycle. This  
35    study was approved by the Institutional Animal Care at the Clinical Research Institute of  
36    Dankook University Hospital (No. DKU-16-027). Mice in the experimental groups were  
37    systemically sensitized with 25 µg of ovalbumin (OVA; Sigma-Aldrich, St. Louis, MO)  
38    dissolved in 200 µl of phosphate buffered saline (PBS) in the presence of 2 mg of aluminum  
39    hydroxide gel as an adjuvant by intraperitoneal injection on days 0 and 5. One week after the  
40    second intraperitoneal injection, mice were challenged intranasally with 100 µl OVA diluted in  
41    20 µl of PBS daily for one week. After that, continual local stimulation was maintained by the  
42    same procedure three times per week for 12 consecutive weeks. During the last eight straight  
43    weeks, 20 ng of SEB diluted in 20 µl of PBS was used as a challenge immediately after the  
44    administration of 3% OVA weekly. Additionally, Indocyanine green-001 (Selleckchem,  
45    Houston, TX; 2.5 mg/kg) or dexamethasone (1 mg/kg) were administered intraperitoneally  
46    each week from 5 weeks through 12 weeks before OVA and SEB administration, respectively.  
47    Mice were randomly assigned to control or experimental group. All mice gained 20.0-29.5 g in  
48    weight and they were healthy at the last challenge day. Mice were sacrificed 24 hours after the  
49    last OVA challenge and all mice included in the experiment were used for analysis (20/20 for  
50    first experiment and 20/20 for second experiment, respectively). The heads of 5 mice from each  
51    group were removed *en bloc* and then fixed in 4% paraformaldehyde for histopathologic  
52    analysis. After exposing the nasal cavity out of the head of the other mice, the nasal mucosa

was taken out meticulously using small curettes and micro-forceps under the microscopic vision.

### ***RT2 Profiler PCR Array tests***

A custom RT2 Profiler PCR Array (PAMM-090ZA; Qiagen, Germany) that could simultaneously detect 84 genes related to the Wnt signaling pathway was used. Genomic DNA contamination, reverse transcription, and positive PCR controls were included in each 96-well set on each plate. Glyceraldehyde-3-phosphate-dehydrogenase (GAPDH) was used as the assay reference gene. Total RNA was isolated from each tissue sample using TRIzol Reagent (Life Technologies, Carlsbad, CA) and quantified with Nanodrop 2000 (Thermo Fisher Scientific, Waltham, MA). The RT2 Profiler PCR Array tests were performed following the instructions of the manufacturer. Briefly, all cDNA in each sample (20 µl) was first diluted with RNase-free water. Then the diluted cDNA was mixed with RT2 SYBR Green qPCR Mastermix (catalog No. 330529; Qiagen) and RNase-free water. Of that mixture, 20 µl per well was added into the 96 wells of the array plate. The qPCR was carried out using the Applied Biosystems 7500 Real-Time PCR System (software ver. 2.0.6; Applied Biosystems, Foster City, CA) under the following thermal cycling conditions: 10 min at 95°C, followed by 40 cycles of 15 sec at 95°C and 1 min at 60°C. The exported Ct values were input to a template Excel file provided by SABiosciences (Qiagen) and uploaded for the online analysis. After data review, qualified data from 35 CMT and 5 NMGT samples were analyzed by applying the  $2^{-\Delta\Delta C_t}$  method.

### ***Culture of human nasal epithelial cells, IF, and immunoblotting***

Normal human nasal epithelial cells (hNECs, PromoCell, Heidelberg, Germany) were cultured

76 in airway epithelial cell growth medium (PromoCell). Antibiotics (1% penicillin and  
77 streptomycin) and an antifungal agent (fungizone, [Life technologies, Grand island]; 1  
78 ml/1,000 ml of medium) were added to the medium (Clonetics Corp, Basel, Switzerland).  
79 hNECs were cultured in 1% fetal bovine serum (FBS)-supplemented medium for one hour  
80 before Wnt3a (R&D Systems, Minneapolis, MN) stimulation. Wnt3a (200 ng/ml) was added  
81 to the reservoirs in fresh medium supplemented with 10% FBS.

82 After washing with PBS, hNECs were fixed in 4% paraformaldehyde (Biosesang, Seoul,  
83 South Korea) for 15 minutes at room temperature. Fixed cells were permeabilized for 30  
84 minutes at 37°C with Triton X-100 in PBS and then blocked for one hour at room temperature  
85 with 3% bovine serum albumin (BSA) in PBST (PBS + 0.5% Tween 20). Cells were incubated  
86 overnight at 4°C with primary antibody (E-cad [610181; BD bioscience, Franklin Lakes NJ]  
87 and  $\alpha$ -SMA [ab5694; Abcam, Cambridge, UK]). After washing with PBST, cells were then  
88 stained with the Alexa Flour 488 IgG anti-rabbit (for E-Cad) and Alexa Flour 555 IgG anti-  
89 mouse (for  $\alpha$ -SMA), which were diluted in PBST with 1% BSA. F-actin was stained with Alexa  
90 Flour 647 phalloidin (Invitrogen, Carlsbad, CA) for 60 min at room temperature. After primary  
91 antibody incubations, cells were then incubated with immunofluorescence secondary  
92 antibodies (Invitrogen). To visualize the nucleus, cells were incubated with 4',6-diamidino-2-  
93 phenylindole (DAPI) (Sigma-Aldrich, St. Louis, MO). The slides were covered with mounting  
94 medium (Dako, Santa Clara, CA). Cells were analyzed using an inverted laser-scanning  
95 microscope (Carl Zeiss Microscopy, Göttingen, Germany). The images were scanned under a  
96  $\times 40$  oil immersion objective. Co-localization of target proteins was analyzed using Zeiss  
97 confocal software (ZEN Lite, Göttingen, Germany).

98 For immunoblotting, proteins were separated in 8-12% sodium dodecyl sulfate-polyacrylamide  
99 gels, transferred to Immobilon-P (Millipore, Billerica, MA). Membranes were incubated

100 sequentially with indicated primary and secondary antibodies. Membranes were incubated with  
101 HRP-conjugated secondary antibodies (1:5000) for one hour at room temperature and  
102 visualized by Luminata western HRP chemiluminescence substrates (Millipore), ECL Plus, or  
103 ECL Select detection reagents (GE Healthcare, San Diego, CA). Immunoblotting for GAPDH  
104 (sc-47724; Santa cruz, Dallas, TX) served as a protein loading control.

105

## Supplementary Figure Legends

**Figure S1.** Epithelial to mesenchymal transition (EMT) markers in wild type and  $Apc^{Min/+}$  mice. (A) Immunohistochemical intensity of  $\beta$ -catenin. (B) The signal intensity of Sox6. OVA, ovalbumin; PBS, phosphate-buffered saline; SEB, staphylococcal enterotoxin B; WT, wild type.  $*P < 0.05$ ,  $**P < 0.01$ ,  $***P < 0.001$ .

**Figure S2.** EMT is exaggerated in the polypoid lesions of  $Apc^{Min/+}$  NP mice. Immunohistochemical expression is scored from 0 to 3 in a high-power field (HPF) which is measured in the epithelial layer of the phosphate-buffered saline (PBS)-instilled control group and non-polypoid or polypoid lesions from the ovalbumin (OVA)/staphylococcal enterotoxin B (SEB) induced NP group. (A and B) The expression score of epithelial markers (E-cadherin and  $\beta$ -catenin). (C) The expression score of mesenchymal marker ( $\alpha$ -SMA).  $*P < 0.05$ ,  $**P < 0.01$ ,  $***P < 0.001$ .

**Figure S3.** EMT-related gene expression analyzed using PCR array. Heatmap with clustering dendrogram representing 96 EMT-related genes of littermate wild type mice ( $n = 3$ ) and  $Apc^{Min/+}$  mice ( $n = 3$ ).

**Figure S4.** Epithelial changes and thickness of sinonasal mucosa from both animal experiments. (A) Epithelial changes defined as the ratio of inflamed mucosal tissue length and total epithelial length in the same location of each group. (B) Percentage of epithelial changes in both mice groups. (C) Epithelial thickness of wild type (WT) and  $Apc^{Min/+}$  mice. (D) Epithelial thickness of BALB/c mice. DEX, dexamethasone; OVA, ovalbumin; PBS, phosphate-buffered saline;

129 SEB, staphylococcal enterotoxin B.  $*P < .05$ ,  $**P < .01$ ,  $***P < .001$ .

130  
131 **Figure S5.** Proliferation and differentiation markers and TGF- $\beta$ 1 signaling in the Apc<sup>Min/+</sup> NP  
132 models. (A-C) The signal intensity of Ki-67, cilia of epithelial cells stained with acetyl- $\alpha$ -  
133 tubulin, and the number of goblet cells stained with Periodic Acid Schiff in Apc<sup>Min/+</sup> mice. (D  
134 and E) Immunohistochemical intensities of TGF- $\beta$ 1 and pSmad-3 (a downstream molecule of  
135 TGF- $\beta$ 1)-positive cell counts in the epithelial layer of wild type C57BL/6J and Apc<sup>Min/+</sup> mice.  
136 HPF, high-power field. OVA, ovalbumin; PBS, phosphate-buffered saline; SEB,  
137 staphylococcal enterotoxin B; WT, wild type.  $*P < 0.05$ ,  $**P < 0.01$ ,  $***P < 0.001$ .

138  
139 **Figure S6.** Local and systemic inflammation is increased in Apc<sup>Min/+</sup> mice. (A and B) IL-4 and  
140 IFN- $\gamma$ -positive cell counts per HPF. (C) Total IgE and specific IgE levels in serum analysis. (D)  
141 Comparing spleen size between WT and Apc<sup>Min/+</sup> mice. HPF, high-power field; Ig,  
142 Immunoglobulin; OD, optical density; OVA, ovalbumin; PBS, phosphate-buffered saline; SEB,  
143 staphylococcal enterotoxin B.  $*P < .05$ ,  $**P < .01$ ,  $***P < .001$

144  
145 **Figure S7.** EMT markers in the Wnt signaling inhibition experiments with BALB/c mice. (A)  
146 Immunohistochemical intensity of  $\beta$ -catenin. (B) The signal intensity of Sox6. DEX,  
147 dexamethasone; OVA, ovalbumin; PBS, phosphate-buffered saline, SEB, staphylococcal  
148 enterotoxin B.  $*P < 0.05$ ,  $**P < 0.01$ ,  $***P < 0.001$ .

149  
150 **Figure S8.** EMT is promoted in the polypoid lesions of BALB/c mice. (A-C) The expression



score (0/1/2/3) of E-cadherin,  $\beta$ -catenin, and  $\alpha$ -SMA of PBS-instilled control group and OVA/SEB-induced NP group. OVA, ovalbumin; PBS, phosphate-buffered saline, SEB, staphylococcal enterotoxin B.  $*P < 0.05$ ,  $**P < 0.01$ ,  $***P < 0.001$ .

**Figure S9.** The effect of ICG-001 treatment on proliferation and differentiation markers, and TGF- $\beta$ 1 signaling. (A) The intensity of Ki-67 in the epithelial layer. (B) The intensity of cilia of epithelial cells stained with acetyl- $\alpha$ -tubulin. (C) The number of goblet cells stained with Periodic Acid Schiff. (D and E) TGF- $\beta$ 1 and pSmad-3 expression of BALB/c mice. DEX, dexamethasone; HPF, high-power field; OVA, ovalbumin; PBS, phosphate-buffered saline, SEB, staphylococcal enterotoxin B.  $*P < .05$ ,  $**P < .01$ ,  $***P < .001$ .

**Figure S10.** Wnt target genes are overexpressed in CRSwNP. (A) The mRNA expression levels of vascular endothelial growth factor (VEGF), angiogenin, tissue inhibitor of metalloproteinase (TIMP)1, and TIMP2. (B) Cyclin D1-positive cell counts in a HPF (x400). (C) TGF- $\beta$ 1 intensity in the epithelial layer of control and NP tissues. (D) pSmad-3-positive cell counts in the sinonasal epithelium. CRSsNP, chronic rhinosinusitis without nasal polyp; CRSwNP, chronic rhinosinusitis with nasal polyp; HPF, high-power field; UP, uncinate process.  $*P < .05$ ,  $**P < .01$ ,  $***P < .001$ .

170 **Table S1.** List of primary antibodies for immunohistochemistry and immunofluorescence

| Primary antibody<br>(Target species)     | Type                      | Source                                | Cat.<br>Number | Dilution |
|------------------------------------------|---------------------------|---------------------------------------|----------------|----------|
| Ki-67<br>(Mouse)                         | Rabbit IgG<br>polyclonal  | Invitrogen<br>(Carlsbad, CA)          | PA5-19462      | 1:200    |
| Acetyl- $\alpha$ -tubulin<br>(Mouse)     | Rabbit IgG<br>Polyclonal  | Cell Signaling<br>(Danvers, MA)       | 5335           | 1:1500   |
| Sox6<br>(Mouse)                          | Rabbit IgG<br>polyclonal  | Novus Biologicals<br>(Centennial, CO) | NBP185811      | 1:200    |
| Twist<br>(Mouse)                         | Rabbit IgG<br>polyclonal  | Abcam<br>(Cambridge, UK)              | ab49254        | 1:100    |
| TGF- $\beta$ 1<br>(Mouse)                | Rabbit IgG<br>polyclonal  | Abcam<br>(Cambridge, UK)              | ab92486        | 1:1000   |
| WNT3A<br>(Mouse)                         | Rabbit IgG<br>Monoclonal  | Cell Signaling<br>(Danvers, MA)       | 2721           | 1:100    |
| Nuclear $\beta$ -catenin<br>(Mouse)      | Rabbit IgG<br>polyclonal  | Santa Cruz<br>(Dallas, TX)            | SC-7963        | 1:200    |
| Cyclin D1<br>(Mouse)                     | Rabbit IgG<br>Monoclonal  | Abcam<br>(Cambridge, UK)              | ab134175       | 1:200    |
| Vimentin<br>(Mouse)                      | Chicken IgY<br>Polyclonal | Novus Biologicals<br>(Centennial, CO) | NB300-223      | 1:200    |
| IL-17<br>(Mouse)                         | Rat IgG1<br>Monoclonal    | LSBio<br>(Seattle, WA)                | LS-B4912       | 1:200    |
| $\alpha$ -smooth muscle<br>actin (Mouse) | Rabbit IgG<br>Polyclonal  | Abcam<br>(Cambridge, UK)              | ab5964         | 1:200    |
| $\beta$ -catenin<br>(Mouse)              | Rabbit IgG<br>Monoclonal  | Cell signaling<br>(Danvers, MA)       | 8480           | 1:100    |
| E-cadherin<br>(Mouse)                    | Rabbit IgG<br>Polyclonal  | Cell signaling<br>(Danvers, MA)       | 4065           | 1:100    |
| Neutrophil<br>(Mouse)                    | Rat IgG2b<br>Monoclonal   | Abcam<br>(Cambridge, UK)              | ab2557         | 1:50     |

|                                          |                           |                                       |          |        |
|------------------------------------------|---------------------------|---------------------------------------|----------|--------|
| IL-4<br>(Mouse)                          | Rat IgG1<br>Monoclonal    | R&D systems<br>(Minneapolis, MN)      | MAB404R  | 1:100  |
| IFN- $\gamma$<br>(Mouse)                 | Rat IgG2a<br>Monoclonal   | R&D systems<br>(Minneapolis, MN)      | MAB785   | 1:100  |
| p-Smad3<br>(Mouse and human)             | Rabbit IgG<br>monoclonal  | Abcam<br>(Cambridge, UK)              | ab52903  | 1:100  |
| Cyclin D1<br>(Human)                     | Rabbit IgG<br>Monoclonal  | Abcam<br>(Cambridge, UK)              | ab134175 | 1:500  |
| TGF- $\beta$ 1<br>(Human)                | Rabbit IgG<br>Polyclonal  | Abcam<br>(Cambridge, UK)              | Ab92486  | 1:1000 |
| Wnt3a<br>(Human)                         | Rabbit IgG<br>Monoclonal  | Cell signaling<br>(Danvers, MA)       | 2721     | 1:100  |
| Frizzled-1<br>(Human)                    | Rabbit IgG<br>Polyclonal  | Novus Biologicals<br>(Centennial, CO) | NLS4150  | 1:200  |
| Frizzled-3<br>(Human)                    | Rabbit IgG<br>Polyclonal  | Novus Biologicals<br>(Centennial, CO) | NLS4454  | 1:250  |
| Nuclear $\beta$ -catenin<br>(Human)      | Rabbit IgG<br>Monoclonal  | Cell Signaling<br>(Danvers, MA)       | 8814     | 1:100  |
| E-cadherin<br>(Human)                    | Mouse IgG2a<br>Monoclonal | BD<br>(Franklin Lakes, NJ)            | 610181   | 1:200  |
| $\alpha$ -smooth muscle<br>actin (Human) | Rabbit IgG<br>Polyclonal  | Abcam<br>(Cambridge, UK)              | ab5694   | 1:200  |
| F-actin, Alexa 647-<br>phalloidin        |                           | Invitrogen<br>(Carlsbad, CA)          | A-22287  | 1:200  |
| IF 2 <sup>nd</sup> Ab-Green              | Mouse IgG<br>Polyclonal   | Invitrogen<br>(Carlsbad, CA)          | DI-2488  | 1:400  |
| IF 2 <sup>nd</sup> Ab-Red                | Rabbit<br>Polyclonal      | Invitrogen<br>(Carlsbad, CA)          | A21207   | 1:400  |
| DAPI                                     | -                         | Sigma-Aldrich<br>(St. Louis, MO)      | D9542    | 1:1000 |

172 **Table S2.** List of mouse gene-specific TaqMan probes for real-time qPCR analysis

| Genes                          | TaqMan Primer | Assay ID      |
|--------------------------------|---------------|---------------|
| <i>IL-4</i>                    |               | Mm00445258_g1 |
| <i>IL-5</i>                    |               | Mm01290072_g1 |
| <i>IL-17A</i>                  |               | Mm00439618_m1 |
| <i>IFN-<math>\gamma</math></i> |               | Mm99999071_m1 |
| <i>GAPDH</i>                   |               | Mm03302249_g1 |

173

174 **Table S3.** List of human gene primers used for real-time qPCR analysis

| Genes             | Forward primer (5'-3')  | Reverse primer (5'-3')      |
|-------------------|-------------------------|-----------------------------|
| <i>WNT1</i>       | CTTCGGCAAGATCGTCAACC    | GTGCAGGATTCGATGGAACC        |
| <i>WNT3A</i>      | GGCTGTTGGGCCACAGTATTCC  | GCTGGGCATGATCTCCACGTAG      |
| <i>WNT5B</i>      | TCAAGAGAGCGAGAAGACTGG   | GTCTGTTCAGAAGCTGAGCCC       |
| <i>WNT8A</i>      | CTGATAACAGGTCCCAAGGC    | ACTTCTCAGCCTGTTGTGGG        |
| <i>β-catenin</i>  | CCAGGTGGTGGTTAATAAGG    | CTGAGGAGAACGCATGATAG        |
| <i>FZD1</i>       | AGCGCCGTGGAGTTCGT       | CGAAAGAGAGTTGTCTAGTGAGGAAAC |
| <i>FZD2</i>       | CACGCCGCGCATGTC         | ACGATGAGCGTCATGAGGTATTT     |
| <i>FZD3</i>       | GGTGTTTCCTTGGCCTGAAGA   | CACAAGTCGAGGATATGGCTCAT     |
| <i>VEGF</i>       | CTACCTCCACCATGCCAAGT    | GCAGTAGCTGCGCTGATAGA        |
| <i>Angiogenin</i> | CATCATGAGGAGACGGGG      | TCCAAGTGGACAGGTAAGCC        |
| <i>TIMP1</i>      | AGACCTACACTGTTGGCTGTGAG | GACTGGAAGCCCTTTTCAGAG       |
| <i>TIMP2</i>      | ATGCACATCACCCCTCTGTGA   | CTCTGTGACCCAGTCCATCC        |
| <i>GAPDH</i>      | ACTCATCAACCCTCCCCCG     | GGCTGAGTTCCTGCTGTCTT        |

175

176 **Table S4.** List of antibodies for immunoblotting

| Antibody                      | Type                  | Source                       | Cat. Number | Dilution |
|-------------------------------|-----------------------|------------------------------|-------------|----------|
| E-cadherin                    | Rabbit IgG Monoclonal | Cell signaling (Danvers, MA) | #3195       | 1:2000   |
| N-cadherin                    | Rabbit IgG Polyclonal | Santa Cruz (Dallas, TX)      | sc-7939     | 1:2000   |
| $\beta$ -catenin              | Mouse IgG1 Monoclonal | Santa Cruz (Dallas, TX)      | sc-7963     | 1:2000   |
| $\alpha$ -smooth muscle actin | Rabbit IgG Polyclonal | Abcam (Cambridge, UK)        | ab5694      | 1:2000   |
| GAPDH                         | Mouse IgG Monoclonal  | Santa Cruz (Dallas, TX)      | sc-47724    | 1:2000   |
| Rabbit IgG HRP                | Goat IgG Polyclonal   | Invitrogen (Carlsbad, CA)    | G21234      | 1:5000   |
| Mouse IgG HRP                 | Goat IgG Polyclonal   | Invitrogen (Carlsbad, CA)    | G21040      | 1:5000   |

177

178 **Table S5.** Over-expressed genes for epithelial to mesenchymal transition in the Apc<sup>Min/+</sup> mice  
 179 relative to the control mice

| Gene symbol | Gene name                                                              | Fold change |
|-------------|------------------------------------------------------------------------|-------------|
| Bmp1        | Bone morphogenetic protein 1                                           | 2.56        |
| Cdh2        | Cadherin 2                                                             | 6.65        |
| Fn1         | Fibronectin 1                                                          | 2.38        |
| Foxc2       | Forkhead box C2                                                        | 2.88        |
| Gng11       | Guanine nucleotide binding protein (G protein), gamma 11               | 6.64        |
| Gsc         | Goosecoid homeobox                                                     | 8.00        |
| Itga5       | Integrin alpha 5 (fibronectin receptor alpha)                          | 5.90        |
| Mmp3        | Matrix metalloproteinase 3                                             | 2.76        |
| Mmp9        | Matrix metalloproteinase 9                                             | 2.92        |
| Serpine1    | Serine (or cysteine) peptidase inhibitor, clade E, member 1            | 5.74        |
| Snai1       | Snail homolog 1                                                        | 6.48        |
| Snai2       | Snail homolog 2                                                        | 2.00        |
| Snai3       | Snail homolog 3                                                        | 11.10       |
| Sox10       | SRY-box containing gene 10                                             | 5.05        |
| Tmeff1      | Transmembrane protein with EGF-like and two follistatin-like domains 1 | 2.32        |
| Tmem132a    | Transmembrane protein 132A                                             | 6.62        |
| Twist1      | Twist homolog 1                                                        | 3.13        |
| Vcan        | Versican                                                               | 4.28        |
| Vps13a      | Vacuolar protein sorting 13A                                           | 2.32        |
| Wnt5b       | Wingless-related MMTV integration site 5B                              | 6.45        |

180
